# Supplementary material for: To enhance the capacity of Li-rich layered oxides by surface modification with metal–organic frameworks (MOFs) as cathodes for advanced lithium-ion batteries
Source: Royal Society of Chemistry journal article supplement (doi:10.1039/c6ta00882h), 2016-01-01
Supplement: c6ta00882h1.pdf [file c6ta00882h1.pdf]

To enhance capacity of Li-rich layered oxides by surface modification  
with metal-organic frameworks (MOFs) as cathode for advanced lithium-  
ion batteries

Qi-Qi Qiao, Guo-Ran Li, Yong-Long Wang, and Xue-Ping Gao\*

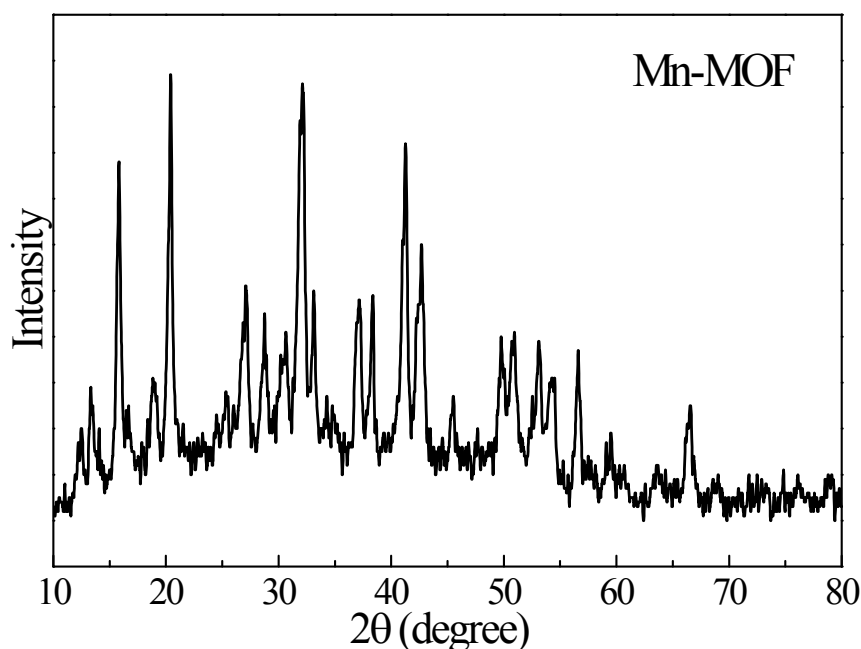

**Fig. S1.** XRD pattern of the as-prepared Mn-MOFs

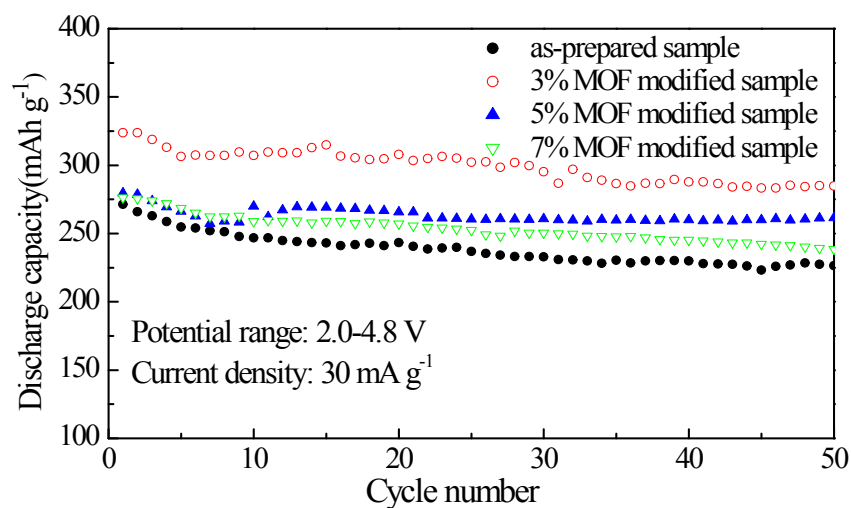

**Fig. S2.** Cycle performances of the as-prepared and different amount MOF-modified  $\text{Li}(\text{Li}_{0.17}\text{Ni}_{0.20}\text{Co}_{0.05}\text{Mn}_{0.58})\text{O}_2$  samples

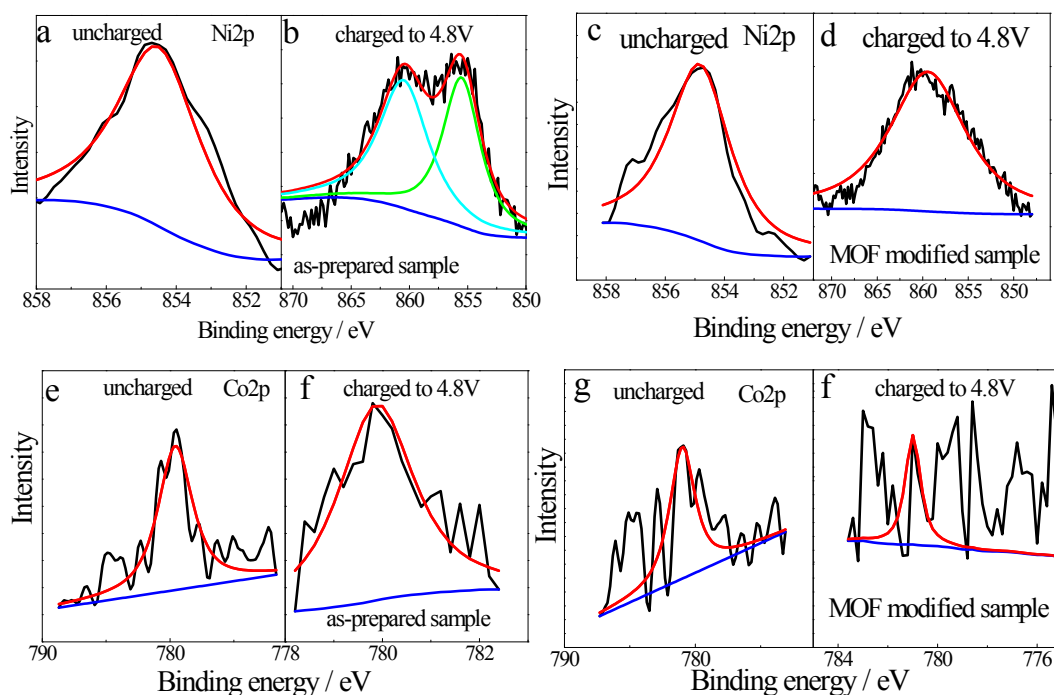

**Fig. S3.** XPS spectra and fitted curves of the as-prepared and MOF-modified  $\text{Li}(\text{Li}_{0.17}\text{Ni}_{0.20}\text{Co}_{0.05}\text{Mn}_{0.58})\text{O}_2$  samples: O 1s: (a, c: uncharged) and (b, d: charged to 4.8 V); Mn2p: (e, g: uncharged) and (f, h: charged to 4.8 V). (black line: original data; red line: calculated pattern; blue line: background; other lines: fitted peaks)

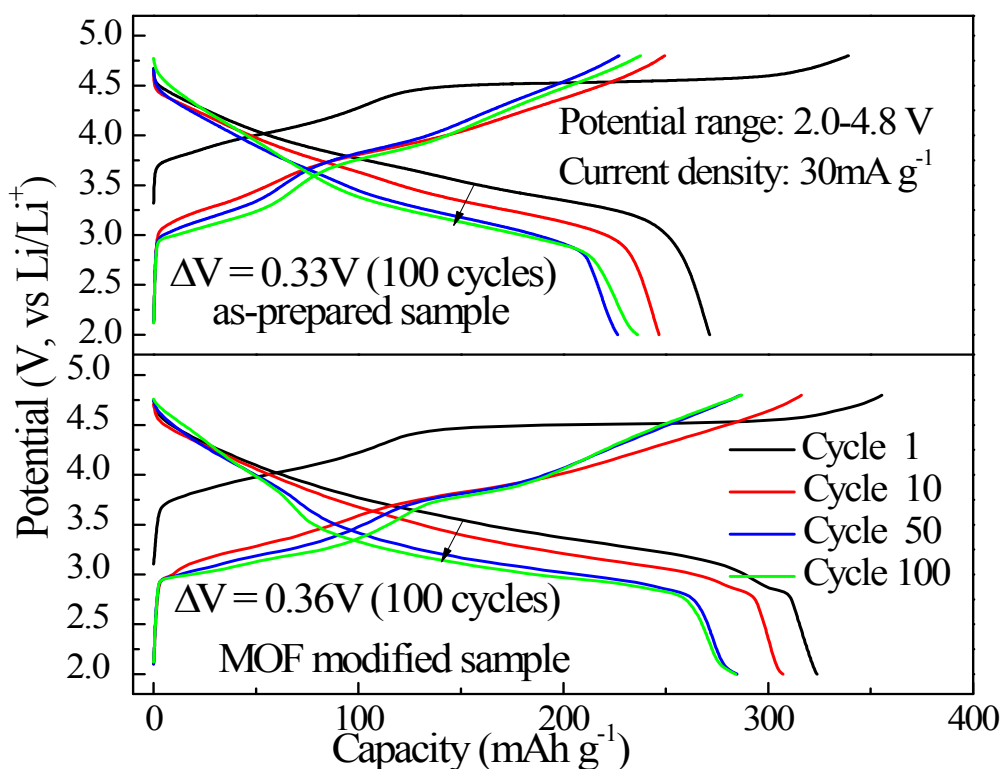

**Fig. S4.** The charge–discharge curves of the as-prepared and MOF-modified  $\text{Li}(\text{Li}_{0.17}\text{Ni}_{0.20}\text{Co}_{0.05}\text{Mn}_{0.58})\text{O}_2$  samples in different cycles at 0.1 C rate ( $30 \text{ mA g}^{-1}$ ) between 2.0 and 4.8 V (vs  $\text{Li}/\text{Li}^+$ )

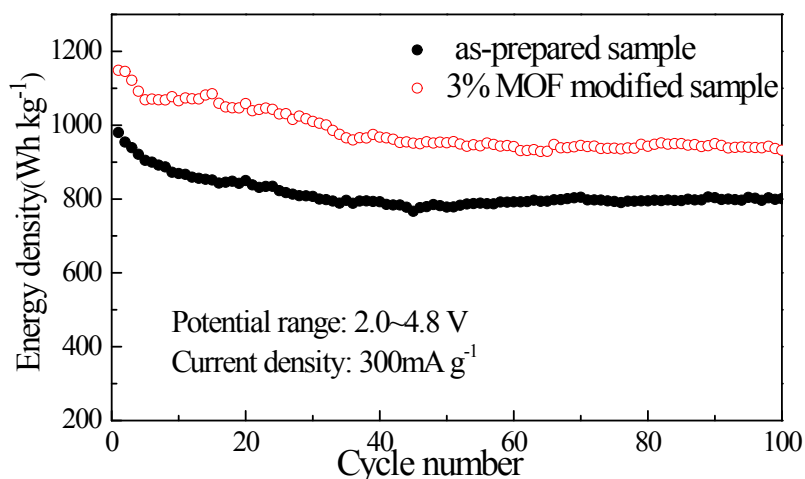

**Fig. S5.** Energy density of the as-prepared and MOF-modified  $\text{Li}(\text{Li}_{0.17}\text{Ni}_{0.20}\text{Co}_{0.05}\text{Mn}_{0.58})\text{O}_2$  samples

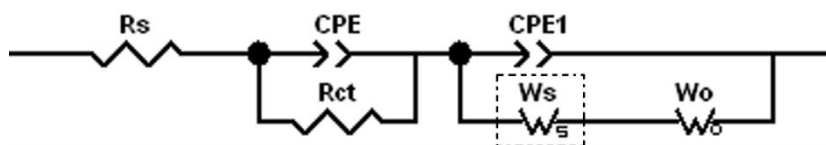

**Fig. S6.** Equivalent circuits used to fit the experimental data.  $R_s$  is solution resistance,  $R_{ct}$  is charge-transfer resistance, CPE and CPE1 are constant phase element,  $W_s$  and  $W_o$  are assigned to the finite Nernst diffusion impedance in the thin film and semi-infinite Warburg diffusion impedance in the bulk, respectively.

**Table S1.** The simulated results from electrochemical impedance spectra of the  $\text{Li}(\text{Li}_{0.17}\text{Ni}_{0.20}\text{Co}_{0.05}\text{Mn}_{0.58})\text{O}_2$  and MOF-modified samples.

| Sample                                                                                             | Cycle | $R_{ct}$ ( $\Omega$ ) | $W_s$ ( $\Omega$ ) | $W_o$ ( $\Omega$ ) |
|----------------------------------------------------------------------------------------------------|-------|-----------------------|--------------------|--------------------|
| $\text{Li}(\text{Li}_{0.17}\text{Ni}_{0.20}\text{Co}_{0.05}\text{Mn}_{0.58})\text{O}_2$            | 1st   | 114.3                 | -                  | 4574               |
|                                                                                                    | 10th  | 67.9                  | 1948               | 2161               |
|                                                                                                    | 20th  | 59.3                  | 2073               | 1491               |
|                                                                                                    | 50th  | 55.2                  | 1480               | 2771               |
|                                                                                                    | 100th | 52.9                  | 1050               | 9093               |
| MOF-coated $\text{Li}(\text{Li}_{0.17}\text{Ni}_{0.20}\text{Co}_{0.05}\text{Mn}_{0.58})\text{O}_2$ | 1st   | 171.0                 | -                  | 219.3              |
|                                                                                                    | 10th  | 70.4                  | -                  | 168.6              |
|                                                                                                    | 20th  | 37.5                  | -                  | 1670               |
|                                                                                                    | 50th  | 43.6                  | 1035               | 2620               |
|                                                                                                    | 100th | 47.4                  | 1279               | 6736               |
